# Supplementary material
Source: publisher figshare collection journal article supplement (https://tandf.figshare.com/ndownloader/files/20961561)
Supplement: Supplementary file 1 [file 20961561]

| **Supplementary table 1:** |  |  |
| --- | --- | --- |
| **Contraceptive usage among *current* users of the combined oral contraceptive pill (COC), N=1283 women** | | |
|  | **Current users** | **Respondents rate** |
|  | n (%) |  |
|  |  |  |
| Age at start of use (mean, sd) | 16.5 (2.2) | 83.1 |
| Duration of use in total (years) |  | 83.1 |
| 1-2 | 82 (7.7) |  |
| 3-5 | 146 (13.7) |  |
| 6-10 | 551 (51.7) |  |
| 11-14 | 183 (17.2) |  |
| >15 | 104 (9.8 |  |
| Generation of contraceptive |  | 70.5 |
| First | 8 (8.8) |  |
| Second | 720 (78.5) |  |
| Third | 107 (11.8) |  |
| Fourth | 45 (5.0) |  |
| Cyproterone acetate-containing | 35 (3.9) |  |
| Ethinyl estradiol dosis (μg) |  | 71.6 |
| 20 | 90 (9.9) |  |
| 30-35 | 802 (88.6) |  |
| Multiphasic | 13 (1.4) |  |
| Regimen of use |  | 79.8 |
| Traditional (21+7)¹ | 634 (61.9) |  |
| Continuous/varied | 390 (38.1) |  |
| Regular menstrual cycle before start of COC |  |  |
|  | 83.2 |
| Yes | 592 (55.4) |  |
| No | 309 (28.9) |  |
| Do not recall | 167 (15.6) |  |
| ¹ 21 days and 7 days hormone free interval | | |
